# Supplementary material for: Nanopillar films with polyoxometalate-doped polyaniline for electrochemical detection of hydrogen peroxide
Source: Royal Society of Chemistry journal article supplement (doi:10.1039/c5an02134k), 2016-01-01
Supplement: c5an02134k1.pdf [file c5an02134k1.pdf]

Supporting Information

## Nanopillar fillms with polyoxometalate-doped polyaniline for electrochemical detection of hydrogen peroxide

MinHo Yang,<sup>a</sup> Dong Seok Kim,<sup>b</sup> Jo Hee Yoon,<sup>b</sup> Seok Bok Hong,<sup>b</sup> Soon Woo Jeong,<sup>a</sup> Dong Eun Yoo,<sup>c</sup> Tae Jae Lee,<sup>a</sup>  
Seok Jae Lee,<sup>a,\*</sup> Kyoung G. Lee,<sup>a,\*</sup> Bong Gill Choi<sup>b,\*</sup>

<sup>a</sup>Department of Nano Bio Research, National NanoFab Center (NNFC), Daejeon 34141, Republic of Korea

<sup>b</sup>Department of Chemical Engineering, Kangwon National University, Samcheok 25913, Republic of Korea

\*E-mail: bgchoi@kangwan.ac.kr

<sup>c</sup>Device Process Technology Team, National NanoFab Center (NNFC), Daejeon 34141, Republic of Korea

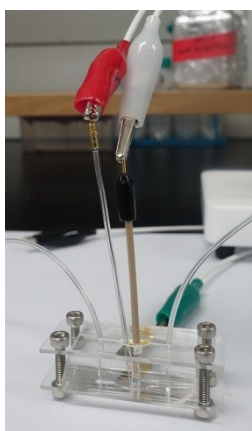

**Figure S1.** Photo of microfluidic cell for flow injection analysis.
